# Supplementary material for: Insights into the Antennal Characteristics and Olfactory Strategy of the Endangered Rhino Stomach Bot Fly Gyrostigma rhinocerontis (Diptera: Oestridae)
Source: MDPI journal article supplement (doi:10.3390/insects13100889), 2022-09-29
Supplement: s1 [file s1]

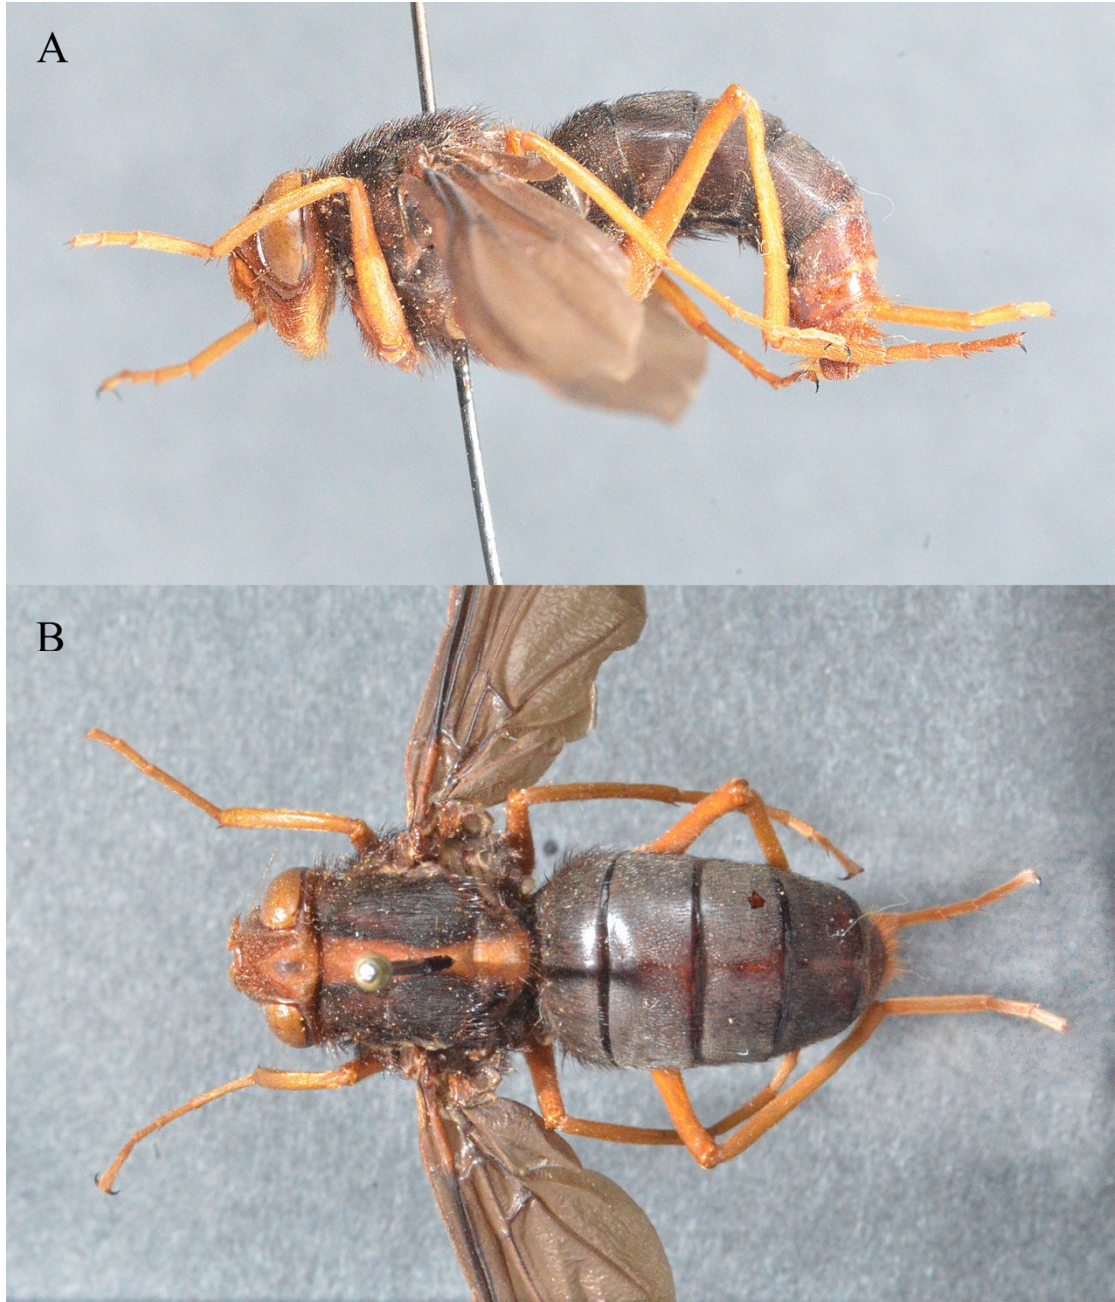

**Supplementary File S1.** Habitus of the entire fly of *Gyrostigma rhinocerontis* (female). (A) Habitus, lateral view; (B) Habitus, dorsal view.
